# Supplementary material for: Pulmonary Disease Burden in Primary Immune Deficiency Disorders: Data from USIDNET Registry
Source: Springer Nature journal article supplement (doi:10.1007/s10875-019-00738-w), 2020-01-09

**Online Supplement for Original Research Manuscript**

**Title:**

Pulmonary Disease Burden in Primary Immune Deficiency Disorders: Data from USIDNET Registry

**Authors:**

Meera Patrawala1, Ying Cui2, Limin Peng2, Ramsay L Fuleihan3, Elizabeth K Garabedian4, Kiran Patel1* and Lokesh Guglani1*

**Author affiliations**:

1Division of Pulmonology, Allergy/Immunology, Cystic Fibrosis and Sleep, Department of Pediatrics, Emory University, Atlanta GA

2Department of Biostatistics, Emory University, Atlanta GA

3Division of Allergy and Immunology, Ann & Robert H. Lurie Children’s Hospital of Chicago, Northwestern University Feinberg School of Medicine, Chicago IL.

4National Human Genome Research Institute, National Institutes of Health, Bethesda, MD

* These authors contributed equally to the work

**Corresponding Author:** Lokesh Guglani MD, 2015 Uppergate Drive, Atlanta GA 30322 USA

Email: [lokesh.guglani@emory.edu](mailto:lokesh.guglani@emory.edu)

**Word Count:**

Supplement – 679 words

Tables – 6

Figures - 4

Supplementary Material

Table S1: Comparison of pulmonary disease between CVID and antibody disorders (Agammaglobulinemia and isolated or isotype antibody deficiency).

|  | **Pulmonary Disease Category: Count (Percentage in each disease condition)** | | | | | |
| --- | --- | --- | --- | --- | --- | --- |
| **PID (USIDNET Total)** | **Airway** | **Parenchymal** | **Pleural** | **Vascular** | **Other** | **Total(Percentage)** |
| **CVID**  **(N=1732)** | 998(57.6%) | 171(9.9%) | 29(1.7%) | 20(1.2%) | 132(7.6%) | 1069(61.7%) |
| **Agammaglobulinemia** **and Isotype or Isolated Ab Def**  **(N=781)** | 278(35.6%) | 25(3.2%) | 7(0.9%) | 7(0.9%) | 38(4.9%) | 313(40.1%) |

Table S2: Comparison of pulmonary disease between CVID and all other primary Immune deficiency disorders combined. With the Pearson’s Chi-squared test, we concluded that the difference in the prevalence of airway disease between all other PIDs compared to CVID was statistically significant with p-value<0.0001, while the difference in the prevalence of parenchymal disease between all other PIDs compared to CVID was not statistically significant with p-value=0.3696.

|  | **Pulmonary Disease Category: Count (Percentage in each disease condition)** | | | | | |
| --- | --- | --- | --- | --- | --- | --- |
| **PID (USIDNET Total)** | **Airway** | **Parenchymal** | **Pleural** | **Vascular** | **Other** | **Total(Percentage)** |
| **CVID**  **(N=1732)** | 998(57.6%) | 171(9.9%) | 29(1.7%) | 20(1.2%) | 132(7.6%) | 1069(61.7%) |
| **All Other PIDs**  **(N=2977)** | 684(23.0%) | 188(6.3%) | 61(2.0%) | 63(2.1%) | 138(4.6%) | 868(29.2%) |

Table S3: Reported Use of Anti-inflammatories for Each Pulmonary Disease by PID

|  | **Pulmonary Disease Category: Count (Percentage of Anti-inflammatories in each Category)** | | | | |
| --- | --- | --- | --- | --- | --- |
|  | **Airway** | **Parenchymal** | **Pleural** | **Vascular** | **Other** |
| **Agammaglobulinemia** | 6(5.6%) | 0(0.0%) | 0(0.0%) | 0(0.0%) | 0(0.0%) |
| **CID** | 15(9.6%) | 2(5.0%) | 2(16.7%) | 1(6.3%) | 5(16.7%) |
| **Complement Deficiency** | 0(0.0%) | 0(0.0%) | 0(0.0%) | 0(0.0%) | 0(-) |
| **Immune Dysregulation** | 12(28.6%) | 10(37.0%) | 5(33.3%) | 6(40.0%) | 3(25.0%) |
| **Isotype or Isolated Ab Def** | 25(14.6%) | 5(38.5%) | 2(50%) | 1(50.0%) | 4(36.4%) |
| **Other Innate Defects** | 2(6.9%) | 1(6.7%) | 0(0.0%) | 1(25.0%) | 2(20.0%) |
| **Phagocyte Defects** | 10(17.2%) | 7(18.4%) | 4(26.7%) | 0(0.0%) | 3(13.6%) |
| **SCID** | 6(8.6%) | 3(9.4%) | 0(0.0%) | 0(0.0%) | 2(18.2%) |
| **CVID** | 129(12.9%) | 31(18.1%) | 9(31.0%) | 3(15.0%) | 24(18.2%) |
| **Thymic Defects** | 1(2.3%) | 1(10.0%) | 0(0.0%) | 1(11.1%) | 1(6.7%) |

Table S4: Reported Use of Biologic Therapy for Each Pulmonary Disease by PID

|  | **Pulmonary Disease Category: Count (Percentage of Biologic Therapy in each Category)** | | | | |
| --- | --- | --- | --- | --- | --- |
|  | **Airway** | **Parenchymal** | **Pleural** | **Vascular** | **Other** |
| **Agammaglobulinemia** | 3(2.8%) | 1(8.3%) | 0(0.0%) | 0(0.0%) | 0(0.0%) |
| **CID** | 14(8.9%) | 5(12.5%) | 0(0.0%) | 4(25.0%) | 3(10.0%) |
| **Complement Deficiency** | 0(0.0%) | 0(0.0%) | 0(0.0%) | 0(0.0%) | 0(-) |
| **Immune Dysregulation** | 18(42.9%) | 14(51.9%) | 11(73.3%) | 12(80.0%) | 2(16.7%) |
| **Isotype or Isolated Ab Def** | 5(2.9%) | 1(7.7%) | 1(25.0%) | 2(100.0%) | 0(0.0%) |
| **Other Innate Defects** | 0(0.0%) | 0(0.0%) | 0(0.0%) | 0(0.0%) | 1(10.0%) |
| **Phagocyte Defects** | 6(10.3%) | 4(10.5%) | 1(6.7%) | 0(0.0%) | 2(9.1%) |
| **SCID** | 11(15.7%) | 7(21.9%) | 2(50.0%) | 2(25.0%) | 5(45.5%) |
| **CVID** | 70(7.0%) | 32(18.7%) | 2(6.9%) | 1(5.0%) | 13(9.9%) |
| **Thymic Defects** | 3(7.0%) | 2(20.0%) | 0(0.0%) | 1(11.1%) | 2(13.3%) |

Table S5: Reported Use of Cytokine Therapy for Each Pulmonary Disease by PID

|  | **Pulmonary Disease Category: Count (Percentage of Cytokine Therapy in each Category)** | | | | |
| --- | --- | --- | --- | --- | --- |
|  | **Airway** | **Parenchymal** | **Pleural** | **Vascular** | **Other** |
| **Agammaglobulinemia** | 0(0.0%) | 0(0.0%) | 0(0.0%) | 0(0.0%) | 0(0.0%) |
| **CID** | 15(9.6%) | 3(7.5%) | 2(16.7%) | 5(31.2%) | 2(6.7%) |
| **Complement Deficiency** | 0(0.0%) | 0(0.0%) | 0(0.0%) | 0(0.0%) | 0(-) |
| **Immune Dysregulation** | 13(31.0%) | 7(25.9%) | 10(66.7%) | 6(40.0%) | 0(0.0%) |
| **Isotype or Isolated Ab Def** | 2(1.2%) | 0(0.0%) | 0(0.0%) | 0(0.0%) | 1(9.1%) |
| **Other Innate Defects** | 12(41.4%) | 6(40.0%) | 2(33.3%) | 0(0.0%) | 4(40.0%) |
| **Phagocyte Defects** | 30(51.7%) | 20(52.6%) | 5(33.3%) | 1(33.3%) | 9(40.9%) |
| **SCID** | 9(12.9%) | 2(6.3%) | 2(50.0%) | 1(12.5%) | 3(27.3%) |
| **CVID** | 18(1.8%) | 6(3.5%) | 2(6.9%) | 0(0.0%) | 3(2.3%) |
| **Thymic Defects** | 0(0.0%) | 0(0.0%) | 0(0.0%) | 0(0.0%) | 0(0.0%) |

Table S6: Reported Use of Immunosuppression for Each Pulmonary Disease by PID

|  | **Pulmonary Disease Category: Count (Percentage of Immunosuppression in each Category)** | | | | |
| --- | --- | --- | --- | --- | --- |
|  | **Airway** | **Parenchymal** | **Pleural** | **Vascular** | **Other** |
| **Agammaglobulinemia** | 9(8.4%) | 2(16.7%) | 1(33.3%) | 1(20.0%) | 1(3.7%) |
| **CID** | 47(30.0%) | 14(35.0%) | 4(33.3%) | 7(43.8%) | 11(36.7%) |
| **Complement Deficiency** | 0(0.0%) | 1(100.0%) | 0(0.0%) | 0(0.0%) | 0(-) |
| **Immune Dysregulation** | 28(66.7%) | 23(85.2%) | 13(86.7%) | 15(100.0%) | 9(75.0%) |
| **Isotype or Isolated Ab Def** | 56(32.7%) | 3(23.1%) | 2(50.0%) | 2(100.0%) | 3(27.3%) |
| **Other Innate Defects** | 12(41.4%) | 11(73.3%) | 1(16.7%) | 3(75.0%) | 7(70.0%) |
| **Phagocyte Defects** | 22(37.9%) | 21(55.3%) | 7(46.7%) | 3(100.0%) | 12(54.5%) |
| **SCID** | 20(28.6%) | 11(34.4%) | 1(25.0%) | 3(37.5%) | 4(36.4%) |
| **CVID** | 316(31.7%) | 90(52.6%) | 10(34.5%) | 8(40.0%) | 51(38.6%) |
| **Thymic Defects** | 6(14.0%) | 3(30.0%) | 0(0.0%) | 0(0.0%) | 2(13.3%) |

Figure S1: Lung biopsy as a diagnostic procedure performed for patients with different forms of lung disease across various PID categories.


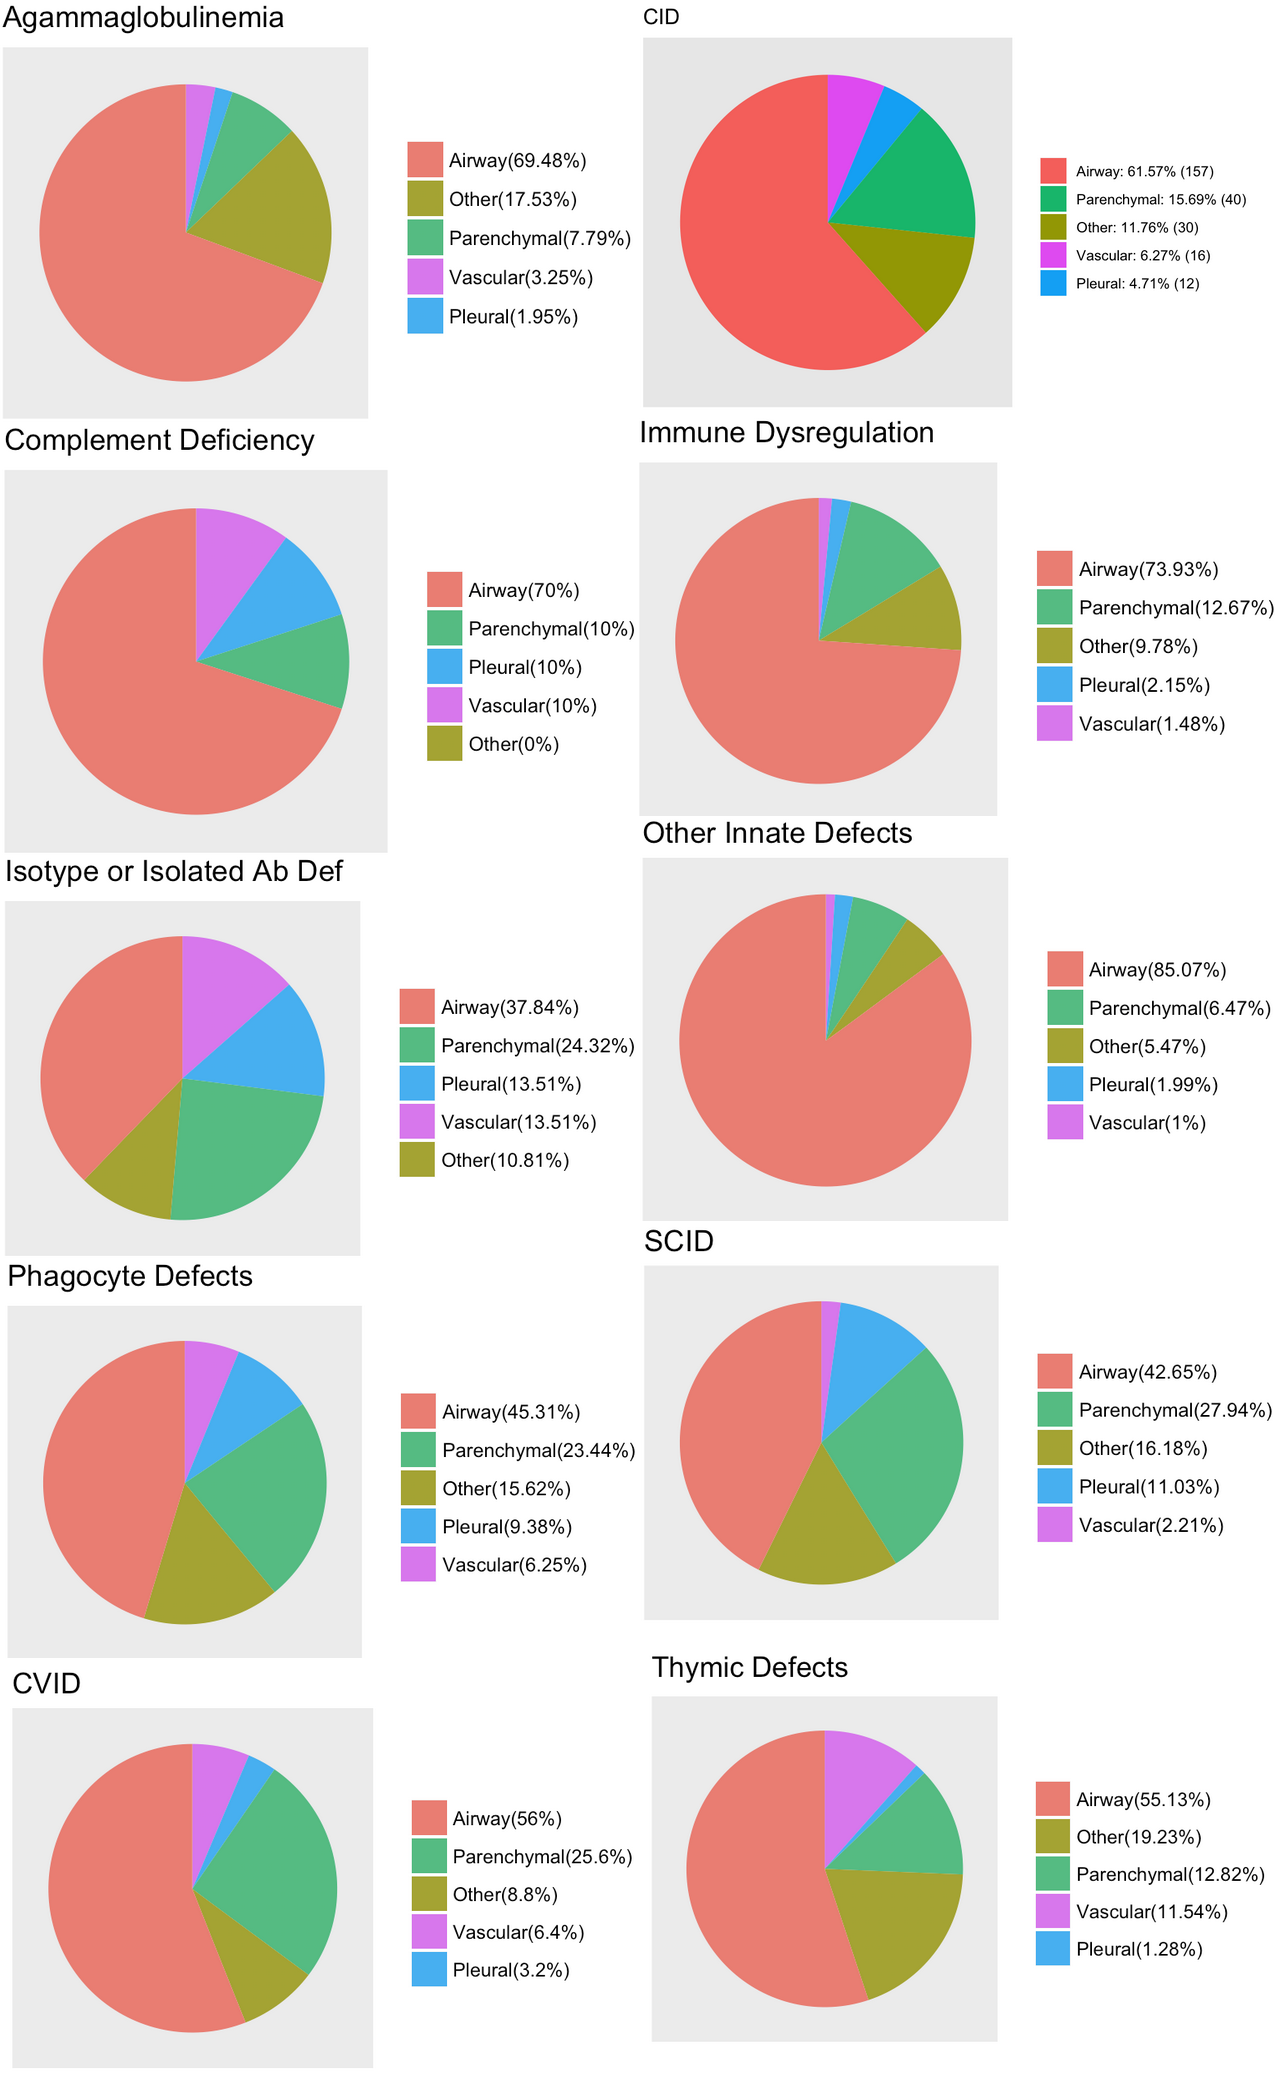


Figure S2: Pattern of Pulmonary Disease With or Without Antifungal Medications. The p-value for the Chi-squared test is 0.03198<0.05, which indicates there is relationship between pulmonary disease and whether the patient has received Prophylaxis Antifungals.


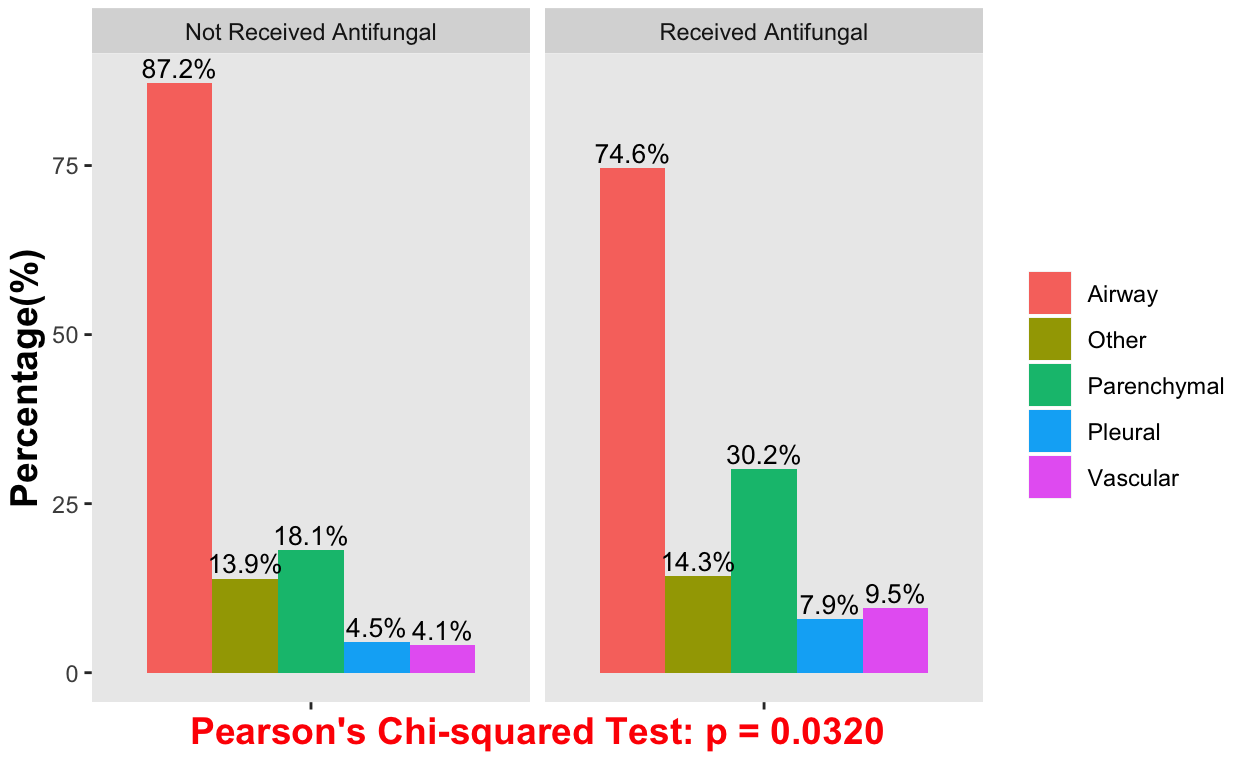


Figure S3: Pattern of Pulmonary Disease With or Without Antibacterial Medications*.* The p-value for the Chi-squared test is 0.3932>0.05, which indicates there is no relationship between pulmonary disease and whether the patient has received Prophylaxis Antibiotics.


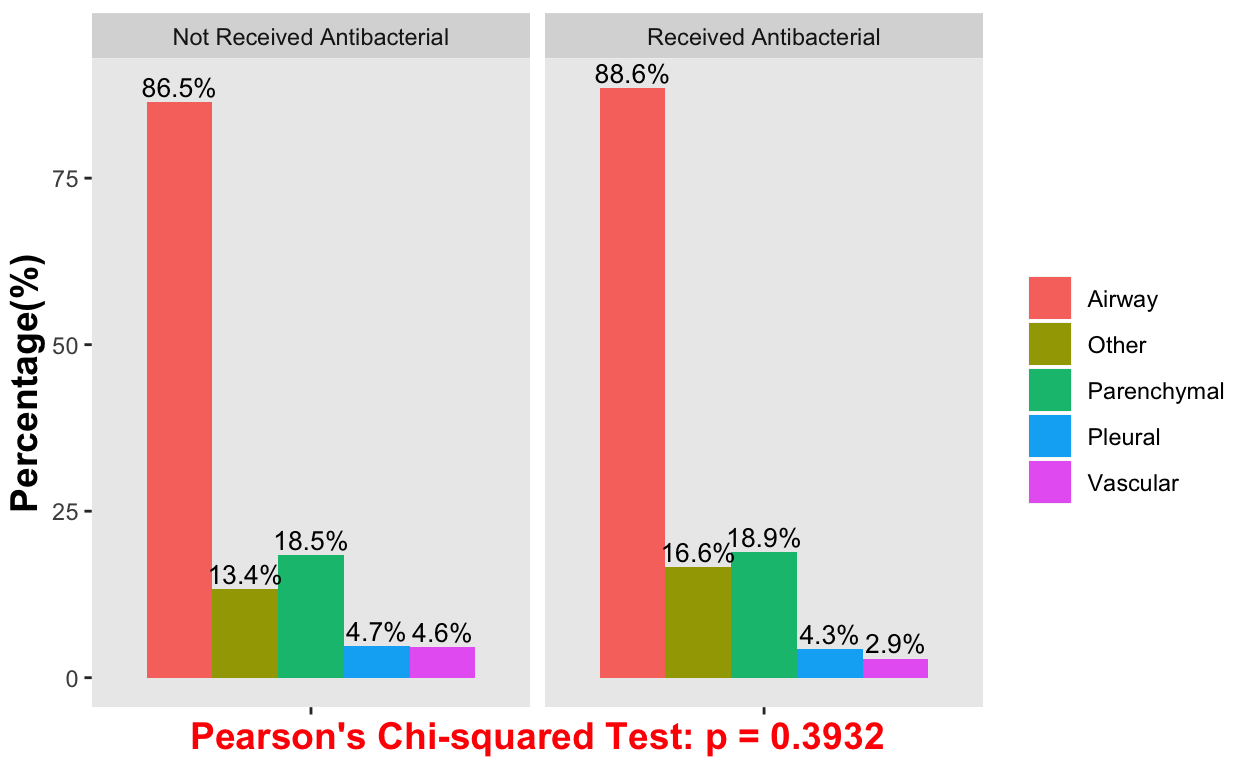


Figure S4: Pattern of Pulmonary Disease With or Without Antiviral Medications. The p-value for the Chi-squared test is 1.867*10-6<0.05, which indicates there is relationship between pulmonary disease and whether the patient has received Prophylaxis Antivirals.


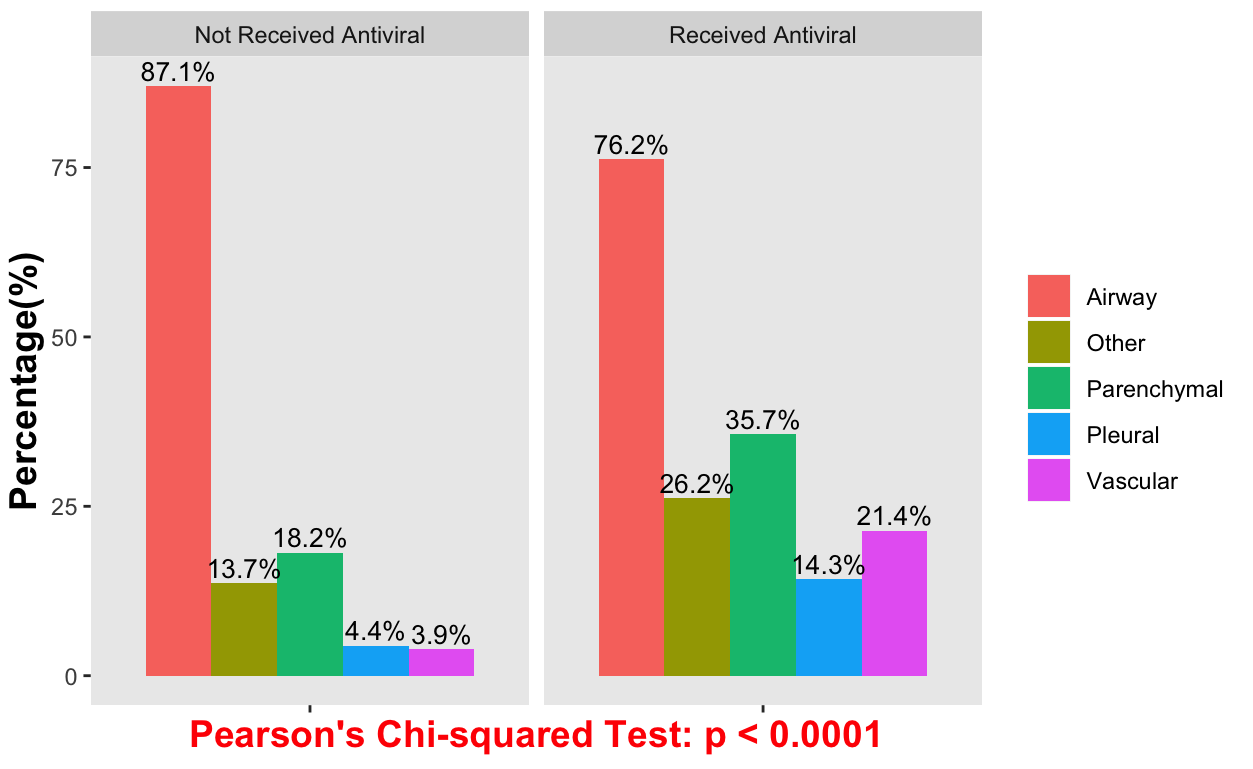

Supplement: MOESM5 [file 17637884]
